# Supplementary material for: Solvent-polymer guest exchange in a carbamazepine inclusion complex: structure, kinetics and implication for guest selection
Source: Royal Society of Chemistry journal article supplement (doi:10.1039/c8ce01766b), 2018-12-13
Supplement: c8ce01766b1.pdf [file c8ce01766b1.pdf]

Supporting Information for

**Solvent-Polymer Guest Exchange in Carbamazepine Inclusion  
Complex: Structure, Kinetics and Implication for Guest  
Selection**

Zhi Zhong,<sup>a</sup> Xiaotong Yang,<sup>a</sup> Bi-Heng Wang,<sup>b</sup> Ye-Feng Yao,<sup>b</sup> Baohua Guo,<sup>a</sup> Lian Yu,<sup>\*c</sup>

Yanbin Huang<sup>\*a</sup> and Jun Xu<sup>\*a</sup>

<sup>a</sup> Key Laboratory of Advanced Materials (MOE), Department of Chemical Engineering, Tsinghua University, Beijing 100084, China; Email: jun-xu@tsinghua.edu.cn (J. X.), and yanbin@tsinghua.edu.cn (Y. H.)

<sup>b</sup> Physics Department and Shanghai Key Laboratory of Magnetic Resonance, School of Physics and Materials Science, East China Normal University, Shanghai 200062, China

<sup>c</sup> School of Pharmacy and Department of Chemistry, University of Wisconsin-Madison, Madison, Wisconsin 53705, USA; Email: lian.yu@wisc.edu

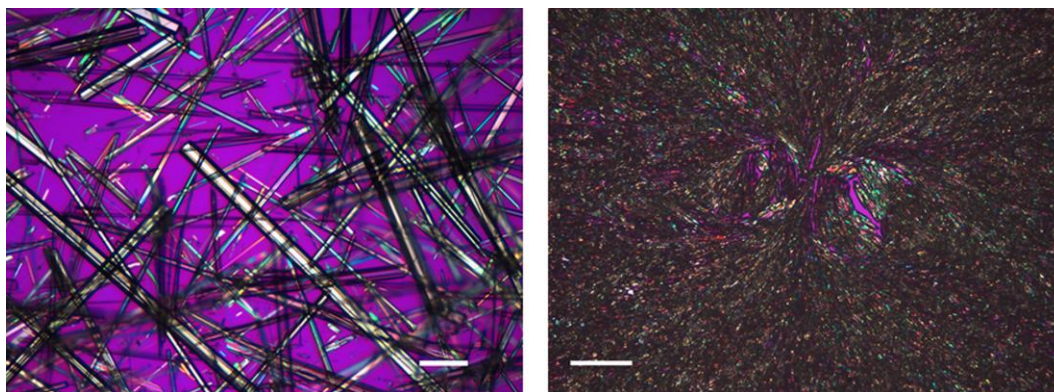

**Fig. S1** POM images showing the crystal morphology of (left) CBZ Form II (toluene) grown from toluene solution and (right) CBZ Form II (PTHF) grown from 50 wt% CBZ/PTHF melt. The distinctly different crystal morphologies indicate the different preferred orientations. The bars represent 200  $\mu\text{m}$  (left) and 100  $\mu\text{m}$  (right), respectively.

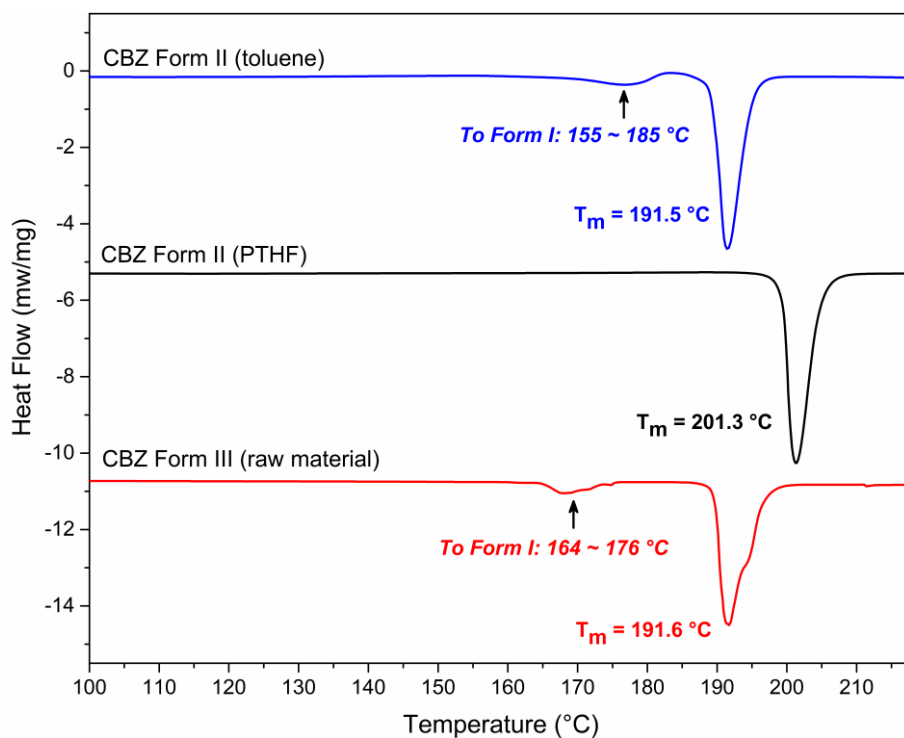

**Fig. S2** DSC thermograms (from top to bottom) of CBZ Form II (toluene), CBZ Form II (PTHF) and CBZ Form III (raw material) at a heating rate of 10 °C/min. The weak endotherm between 155 and 185 °C for CBZ Form II (toluene) is attributed to the solvent release and conversion to CBZ Form I which is stable at high temperatures. The generated CBZ Form I then melted associated with a sharp endothermic peak around 191.5 °C. CBZ Form II (PTHF) showed no thermal events before the single sharp endothermic peak at about 201.3 °C due to melting. CBZ Form III (raw material) also transformed to CBZ Form I during the heating scan in the temperature range of 164 to 176 °C.

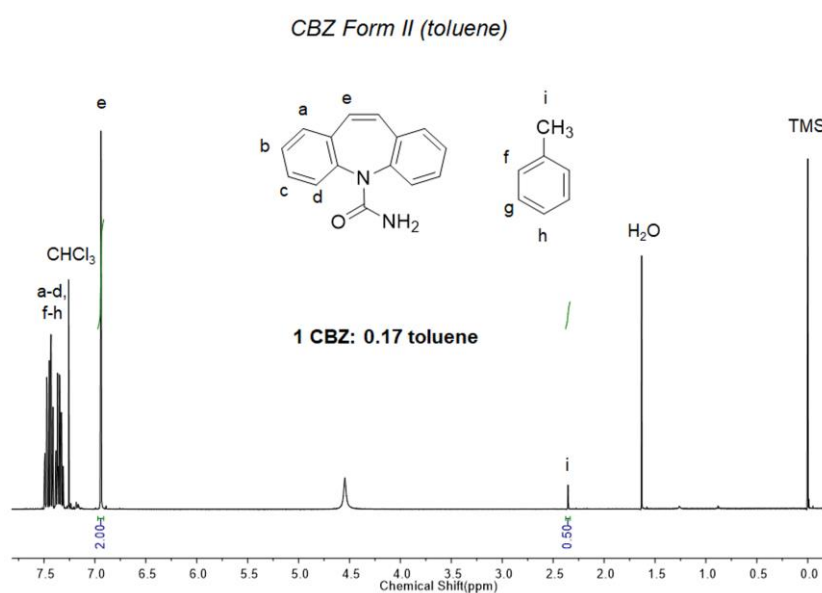

(a)

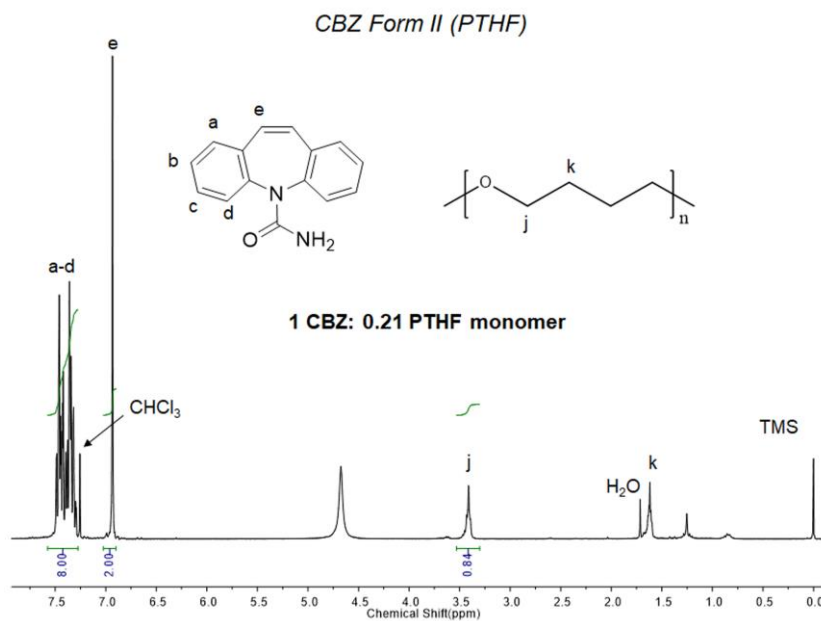

**Fig. S3**  $^1\text{H-NMR}$  spectra of (a) CBZ Form II (toluene) and (b) CBZ Form II (PTHF).  $\text{CDCl}_3$  was used as the solvent. Characteristic signals of the different protons in CBZ, toluene and PTHF are marked with corresponding letters. The stoichiometric ratios of CBZ:toluene and CBZ:PTHF monomer were calculated using the integral area of the characteristic peaks.

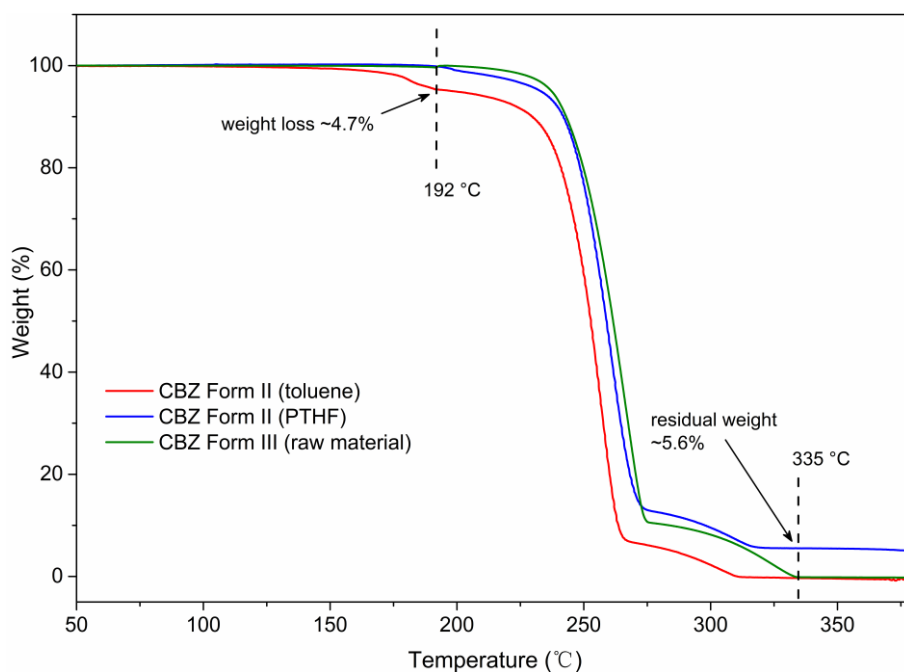

**Fig. S4** TGA thermograms (from top to bottom) of CBZ Form II (toluene), CBZ Form II (PTHF) and CBZ Form III (raw material). The weight loss ( $\sim 4.7$  wt%) before  $192\text{ }^\circ\text{C}$  for CBZ Form II (toluene) was associated with the solvent release, which was not detected for CBZ Form II (PTHF) and CBZ Form III. At  $335\text{ }^\circ\text{C}$  when almost all CBZ molecules were lost, there was still  $\sim 5.6\%$  of

the initial weight remaining, which should correspond with the guest PTHF.

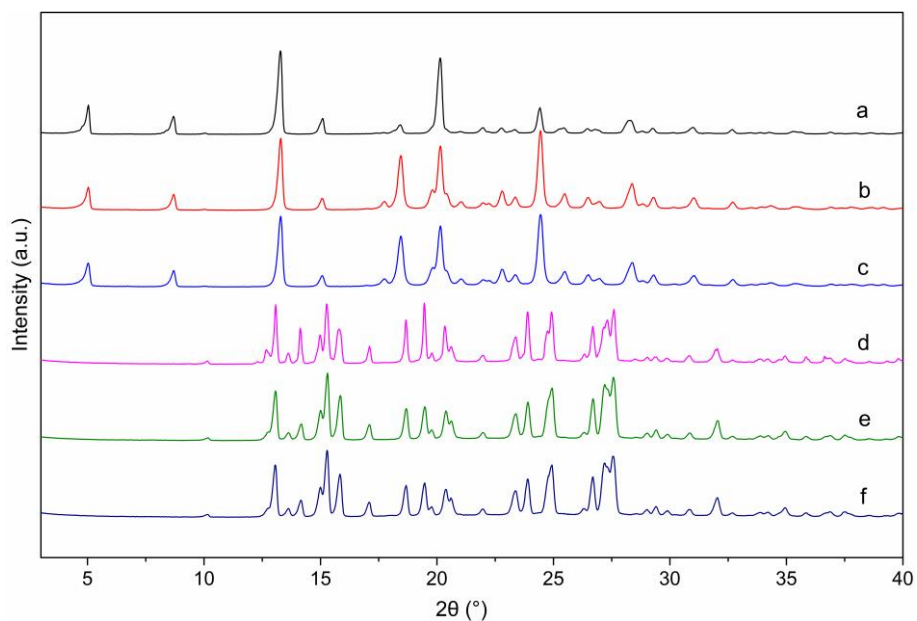

(a)

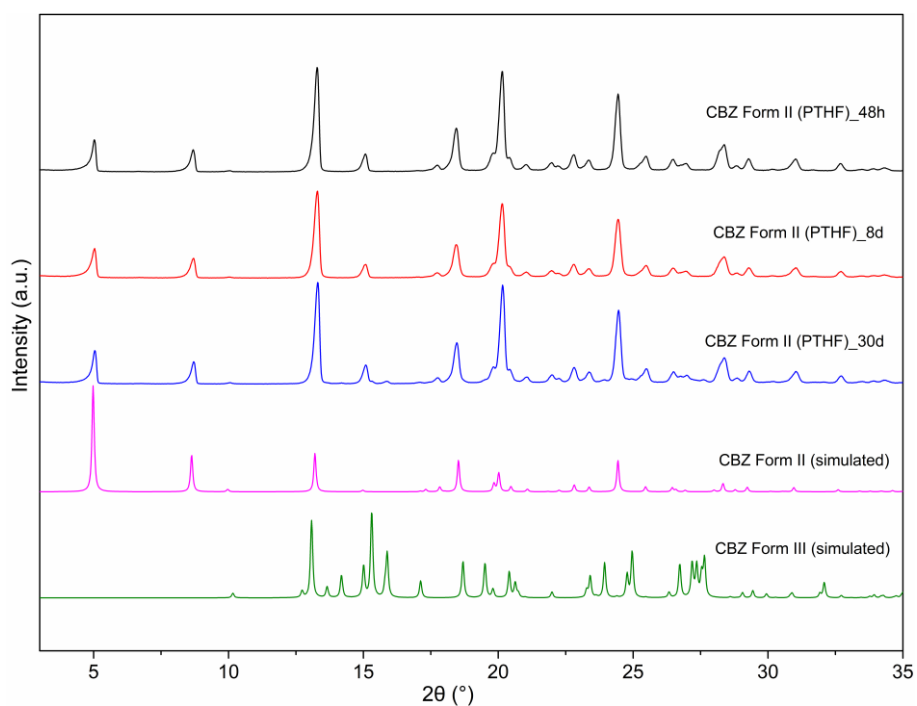

(b)

**Fig. S5** (a) PXR D patterns of CBZ Form II (PTHF) and CBZ Form III before and after equilibrium solubility test: *a.* initial CBZ Form II (PTHF); *b.* CBZ Form II (PTHF) after solubility test ( $C_{\text{PTHF}} = 12 \text{ mg/mL}$ ); *c.* CBZ Form II (PTHF) after solubility test ( $C_{\text{PTHF}} = 0 \text{ mg/mL}$ ); *d.* initial CBZ Form III; *e.* CBZ Form III after solubility test ( $C_{\text{PTHF}} = 12 \text{ mg/mL}$ ); *f.* CBZ Form III after solubility test ( $C_{\text{PTHF}} = 0 \text{ mg/mL}$ ). (b) PXR D patterns of CBZ Form II (PTHF) after suspending in toluene for different times. Only tiny amounts of CBZ Form III can be observed after 30 days, indicating the

long-term stability of CBZ Form II (PTHF) in toluene.

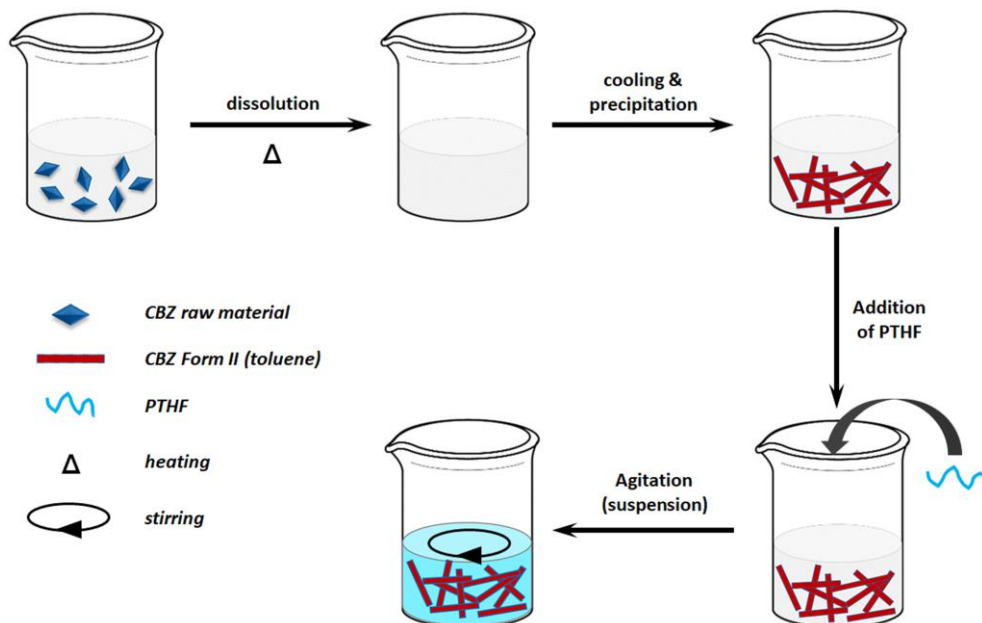

**Fig. S6** Schematic representation of the experimental procedure for guest exchange. CBZ raw material (Form III) was first dissolved in hot toluene, followed by cooling to room temperature. After needle-like CBZ Form II (toluene) crystals were precipitated, appropriate amounts of PTHF ( $C_{\text{PTHF}} = 12 \text{ mg/mL}$ ) was added and agitation was applied to initiate the guest exchange.



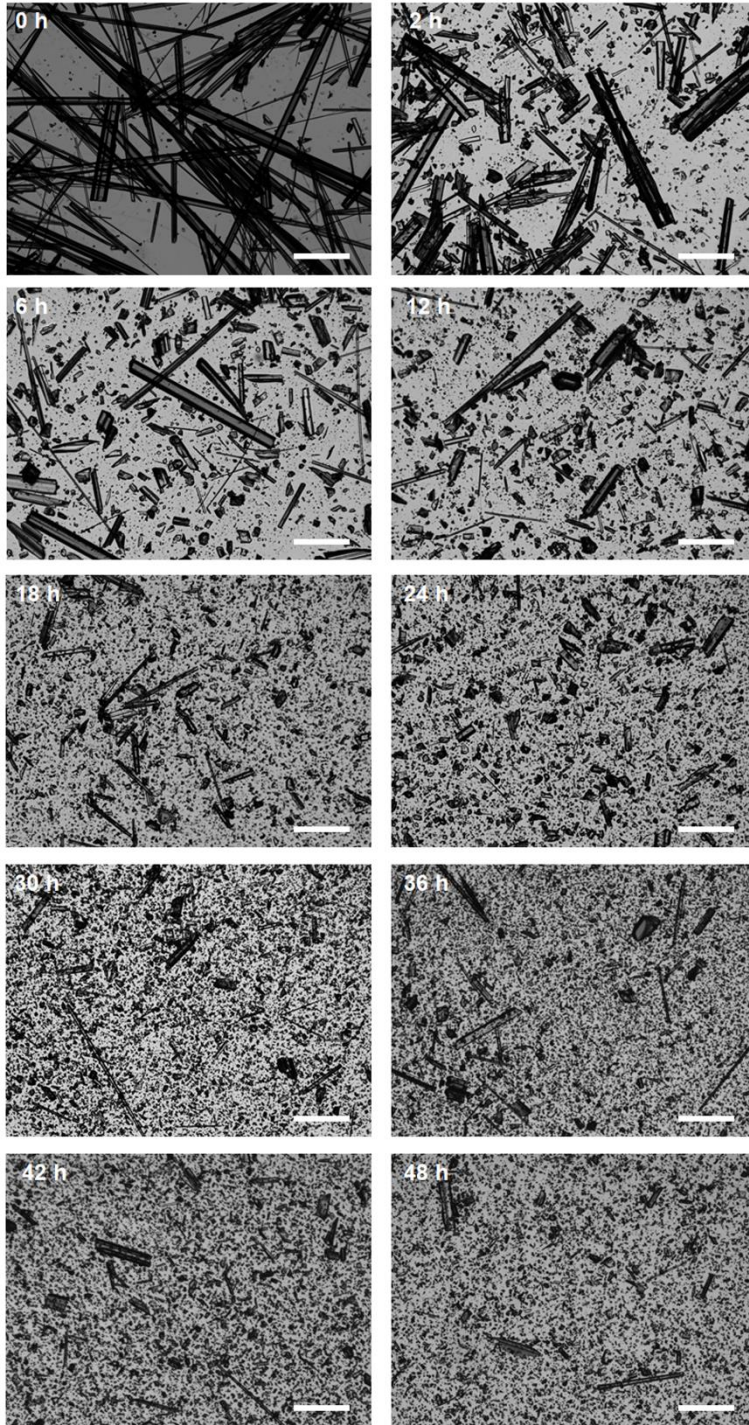

(a)

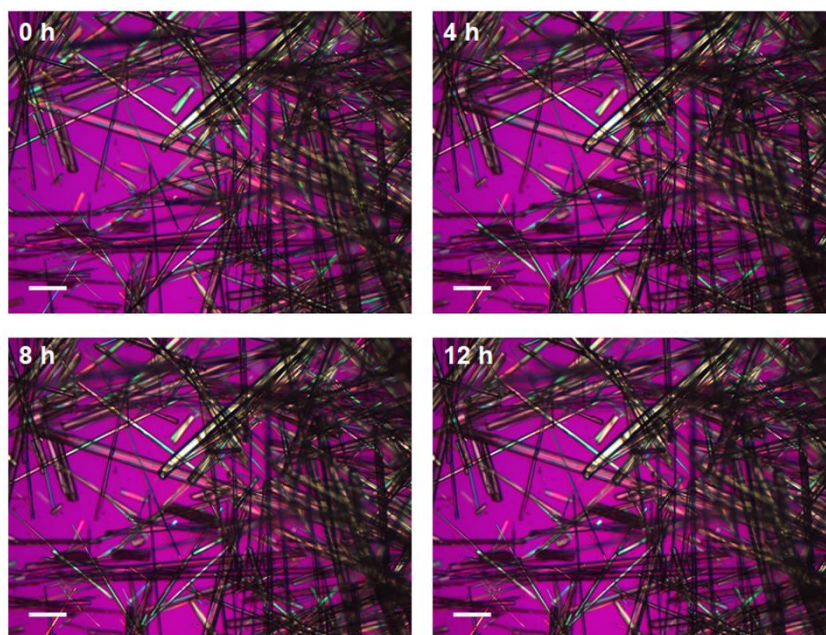

(b)

**Fig. S7** (a) POM images of the guest exchange experiments (initial  $C_{\text{PTHF}} = 12 \text{ mg/mL}$ ) with stirring. The crystal morphology gradually changed with time. The initial needle-like crystals broke apart and smaller crystals formed. (b) POM images of CBZ Form II (toluene) in toluene solution (initial  $C_{\text{PTHF}} = 12 \text{ mg/mL}$ ) without stirring. No crystal morphology changes were observed even after 12 h. The bars represent  $200 \mu\text{m}$ .

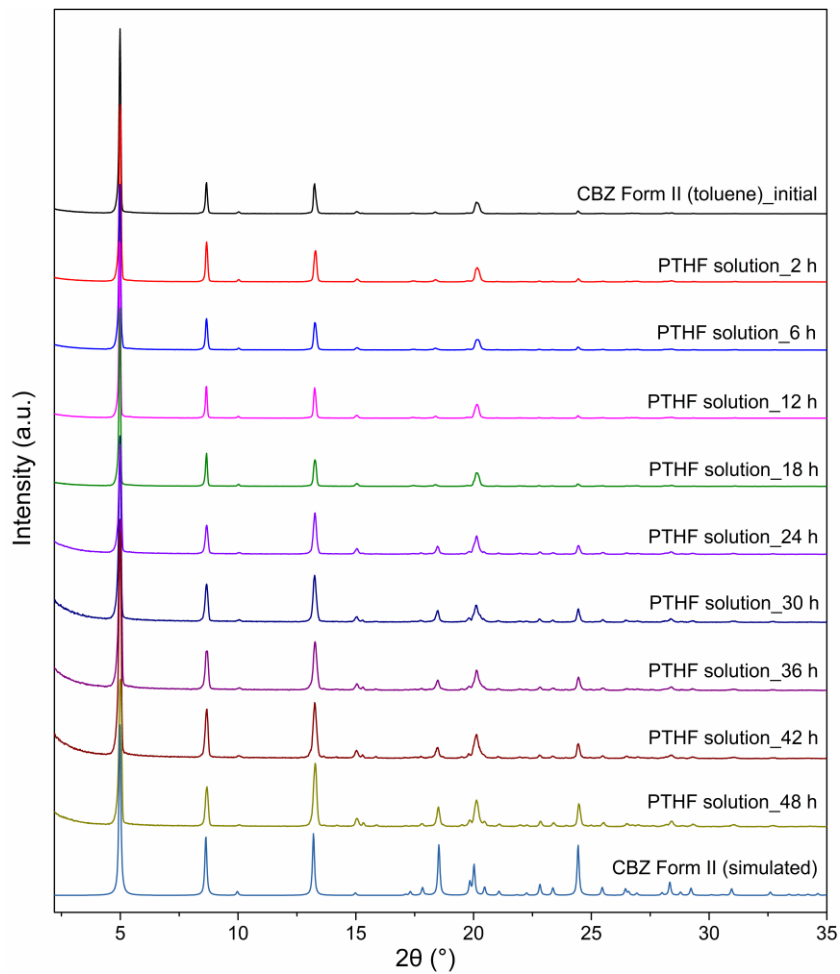

(a)

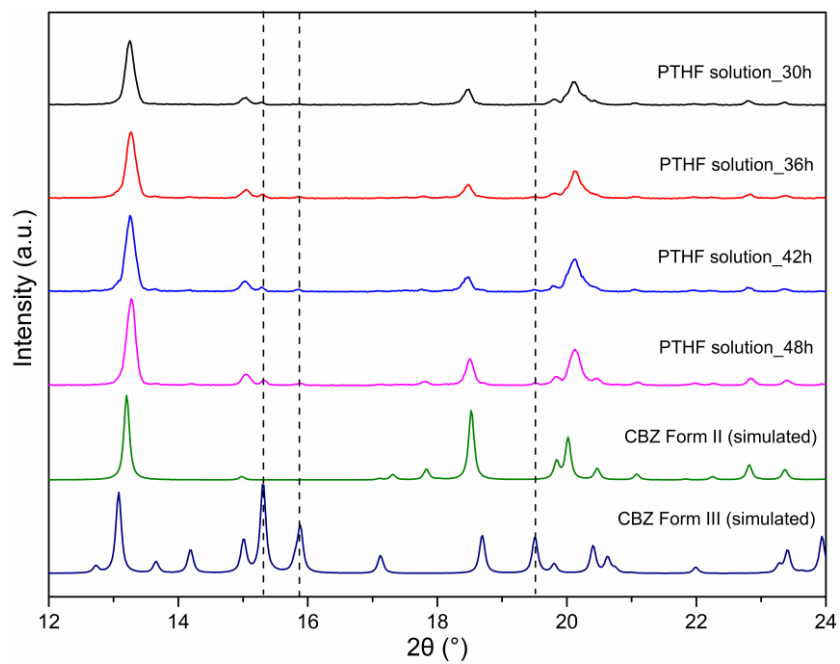

(b)

**Fig. S8** (a) PXR D patterns of the CBZ crystals isolated from the guest exchange experiment (initial



$C_{\text{PTHF}} = 12 \text{ mg/mL}$ ) at different time intervals. The diffraction peaks characteristic of CBZ Form II remained almost unchanged for up to 48 h. (b) Very small amounts of CBZ Form III can be observed after 30 h (characteristic peaks are marked by the black dashed lines)

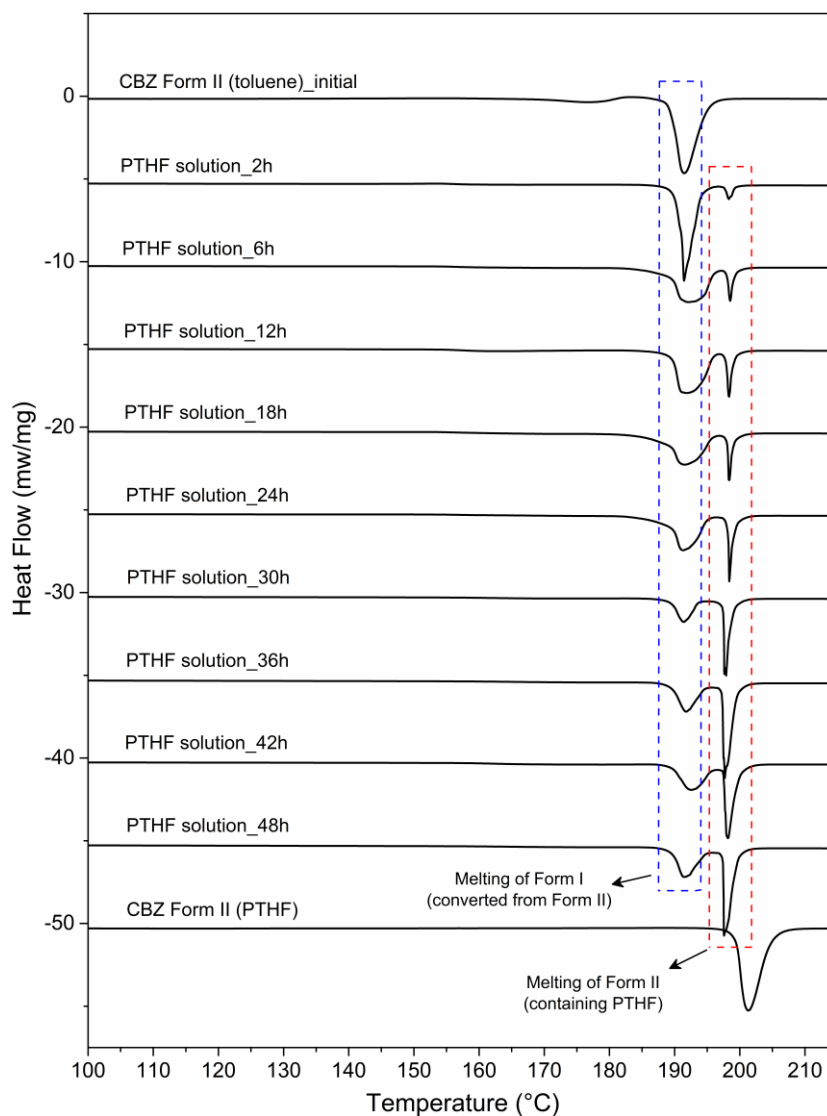

**Fig. S9** DSC thermograms of the CBZ crystals isolated from the guest exchange experiment (initial  $C_{\text{PTHF}} = 12 \text{ mg/mL}$ ) at different time intervals. In addition to the melting endotherm of CBZ Form I converted from CBZ Form II (toluene), a new endotherm appeared at  $\sim 198 \text{ }^\circ\text{C}$  corresponding to the melting of CBZ Form II containing PTHF.

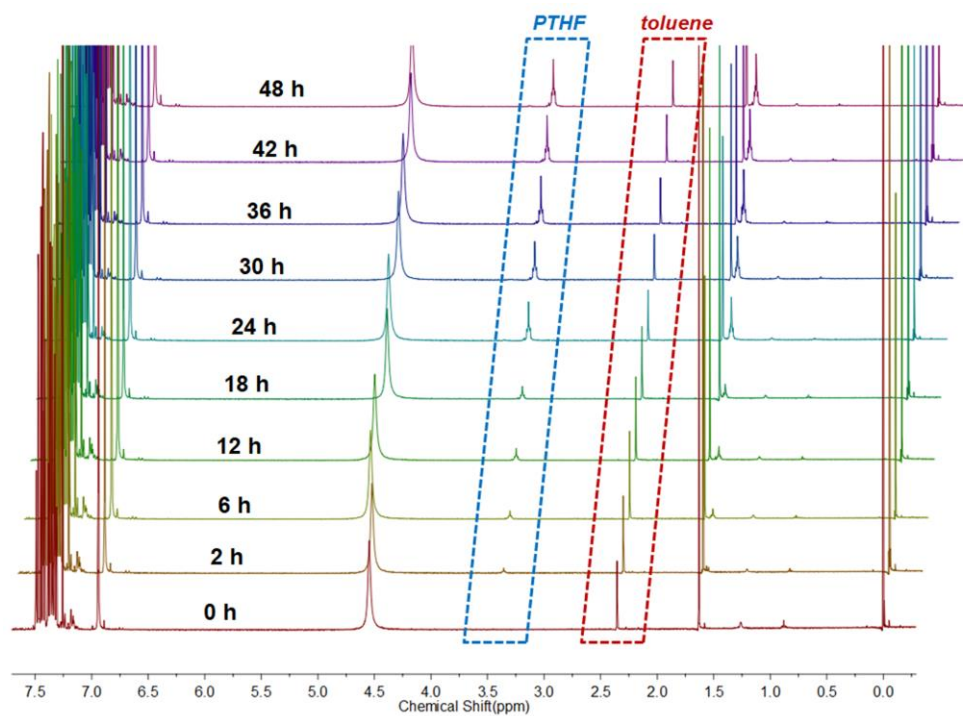

**Fig. S10** <sup>1</sup>H-NMR spectra of the CBZ crystals isolated from the guest exchange experiments (initial  $C_{\text{PTHF}} = 12 \text{ mg/mL}$ ) at different time intervals. The intensities of the proton signals characteristic of PTHF increased with time, while that of toluene showed the opposite trend.

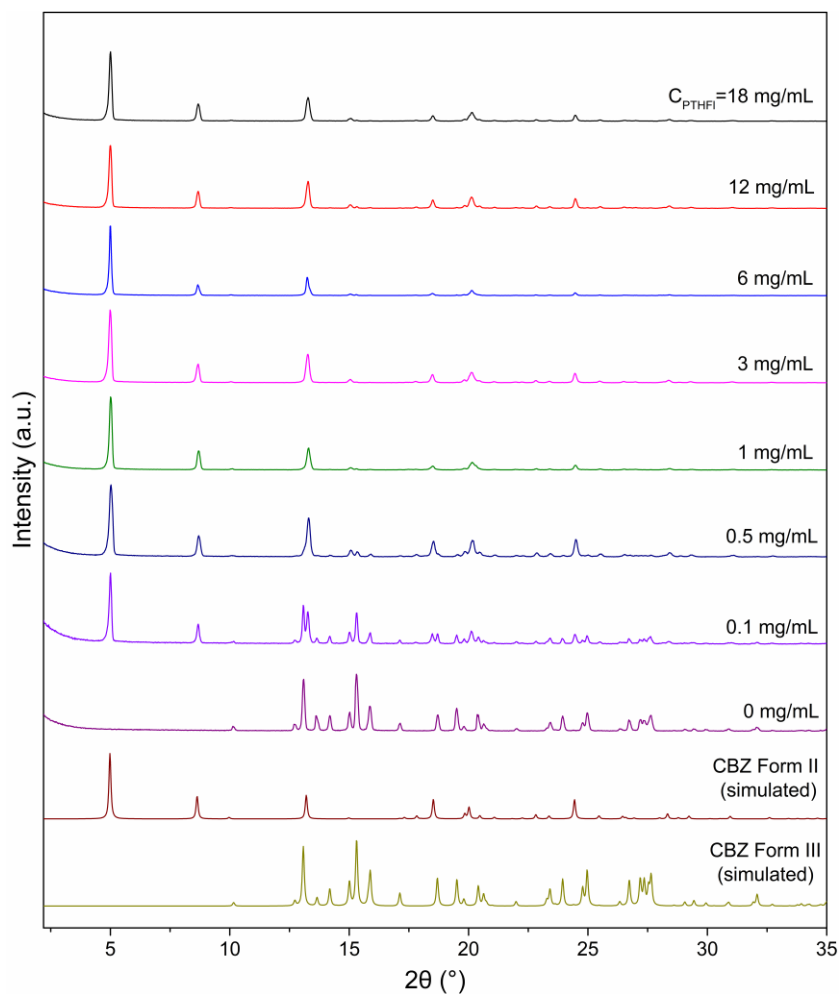

**Fig. S11** PXR D patterns of the CBZ crystals isolated from the guest exchange experiments (with different initial PTHF concentrations) at 48 h. With  $C_{\text{PTHF}} \geq 1$  mg/mL, the channel structure characteristic of CBZ Form II retained for at least 48 h. In contrast, noticeable CBZ Form III was observed at 48 h when  $C_{\text{PTHF}} < 1$  mg/mL.

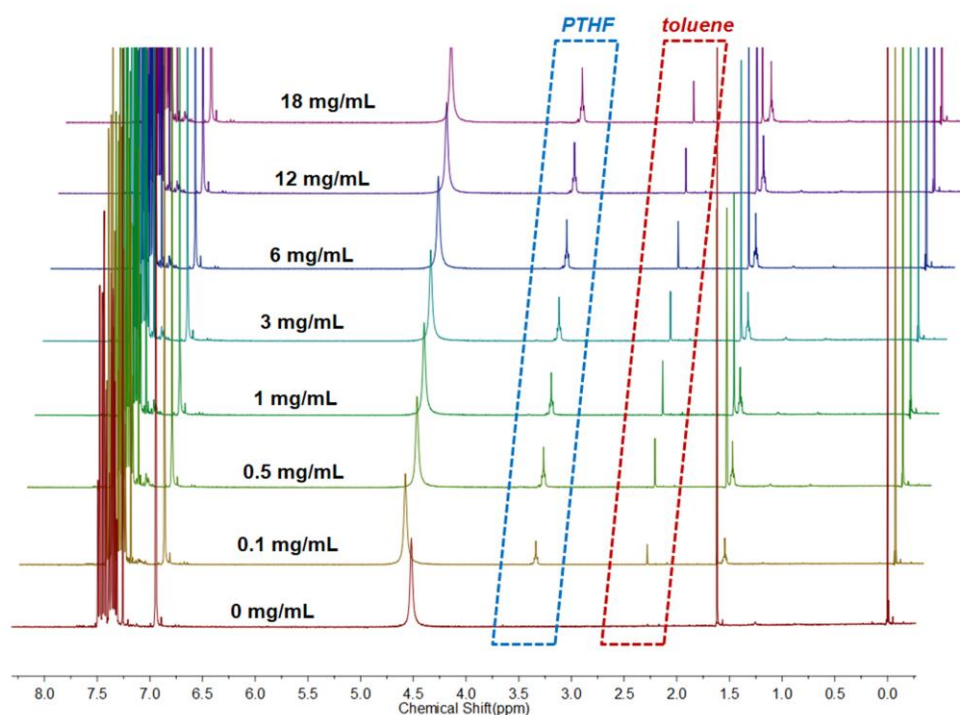

**Fig. S12** <sup>1</sup>H-NMR spectra of the CBZ crystals isolated from the guest exchange experiments (with different initial PTHF concentrations) at 48 h.

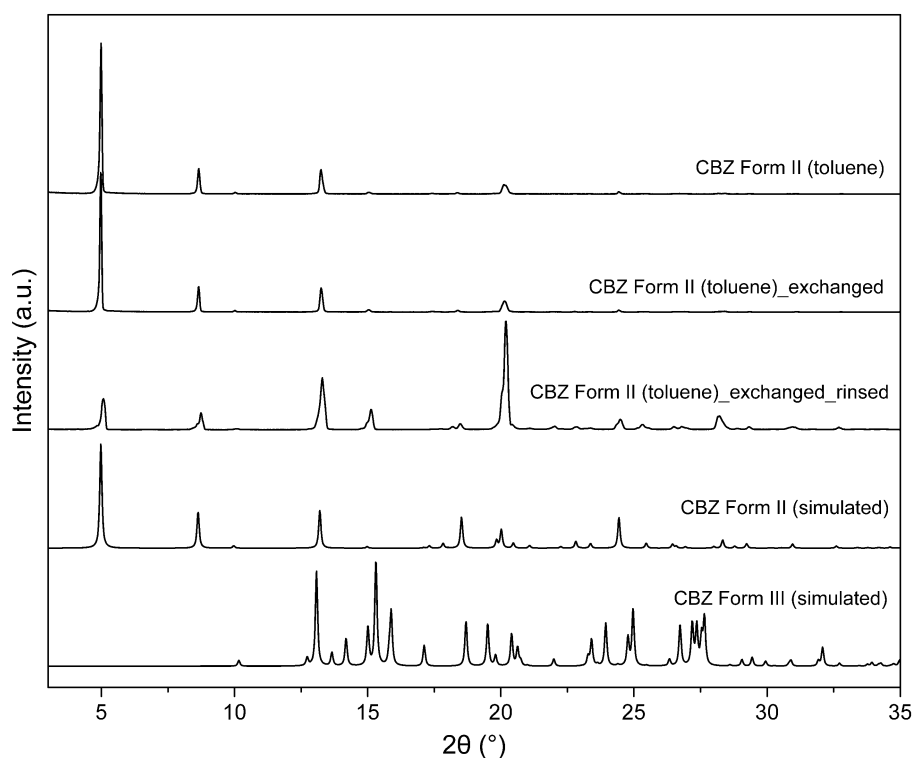

**Fig. S13** PXRD patterns (from top to bottom): initial CBZ Form II (toluene); guest-exchanged CBZ Form II (initial  $C_{\text{PTHF}} = 12$  mg/mL); guest-exchanged CBZ Form II after rinsing with EtOAc; calculated CBZ Form II and Form III. The channel structure characteristic of CBZ Form II was maintained after rinsing, however the relative intensities of the diffraction peaks showed changes

likely due to the variation in preferred orientation.

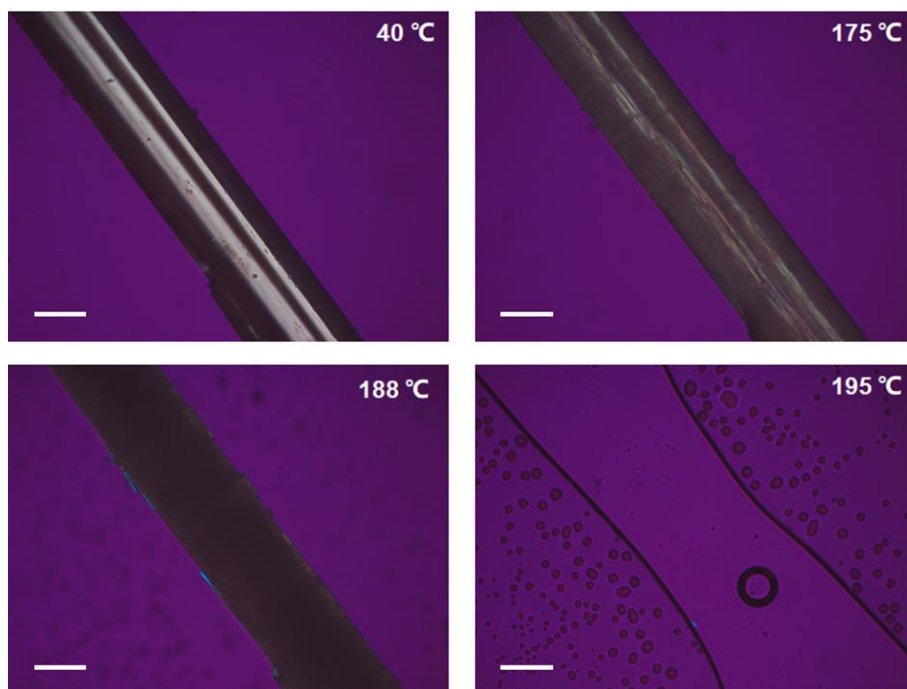

**Fig. S14** Hot-stage POM images of the initial CBZ Form II (toluene) at a heating rate of 10 °C/min. Crystal darkening was observed during heating followed by a melting process. The bars represent 50  $\mu\text{m}$ .

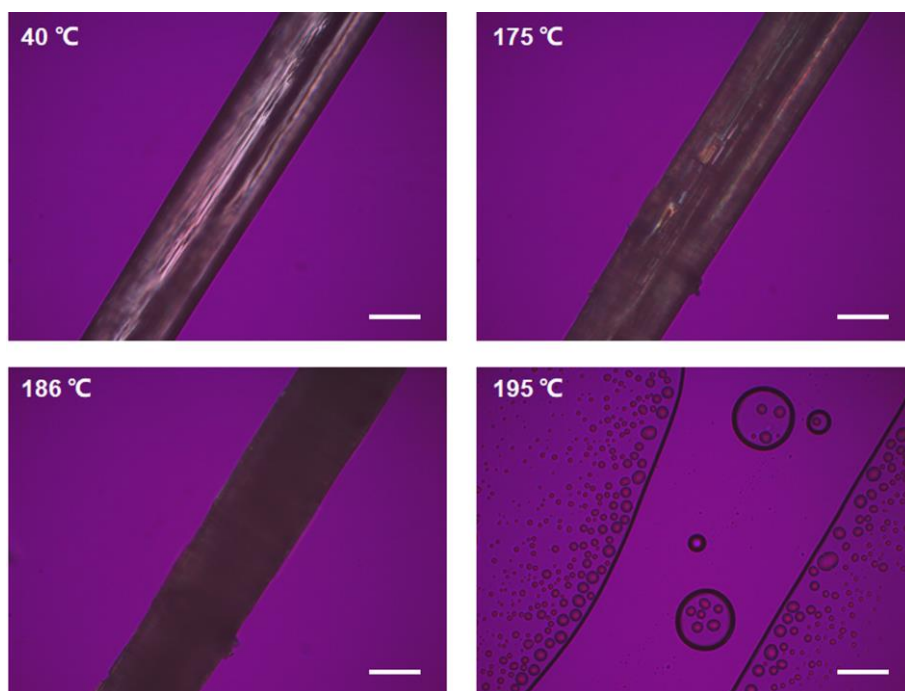

**Fig. S15** Hot-stage POM images of the guest-exchanged and rinsed CBZ Form II at a heating rate of 10 °C/min. Crystal darkening was observed during heating followed by a melting process, similar



to that observed for the initial CBZ Form II (toluene). The bars represent 50  $\mu\text{m}$ .

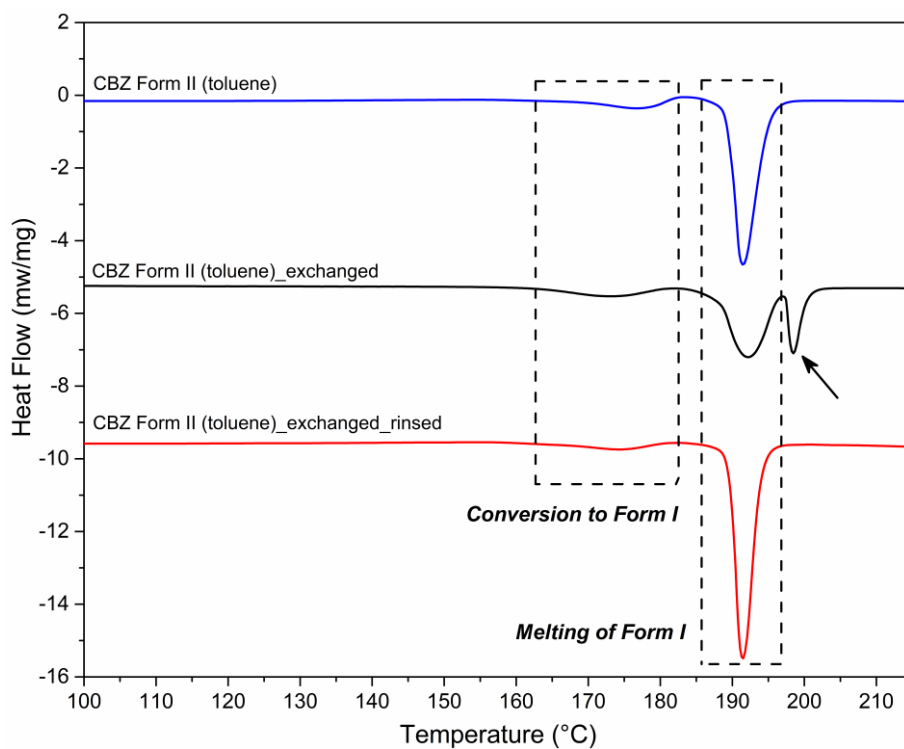

**Fig. S16** DSC thermograms of CBZ Form II crystals (from top to bottom): initial CBZ Form II (toluene); guest-exchanged CBZ Form II (initial  $C_{\text{PTHF}} = 12 \text{ mg/mL}$ ); guest-exchanged CBZ Form II after rinsing with EtOAc. The endotherm ( $\sim 198 \text{ }^{\circ}\text{C}$ ) characteristic of the CBZ Form II containing PTHF could only be observed for the guest-exchanged CBZ Form II crystals.

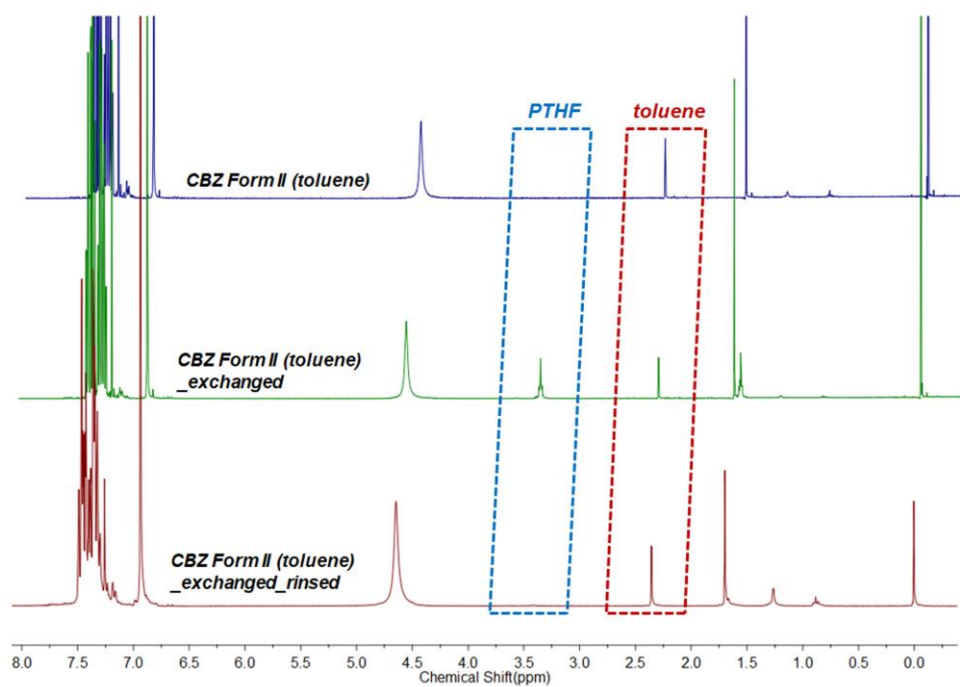

**Fig. S17** <sup>1</sup>H-NMR spectra of CBZ Form II crystals (from top to bottom): initial CBZ Form II (toluene); guest-exchanged CBZ Form II (initial  $C_{\text{PTHF}} = 12$  mg/mL); guest-exchanged CBZ Form II after EtOAc rinsing. The proton signals characteristic of PTHF could only be observed for the guest-exchanged CBZ Form II crystals.

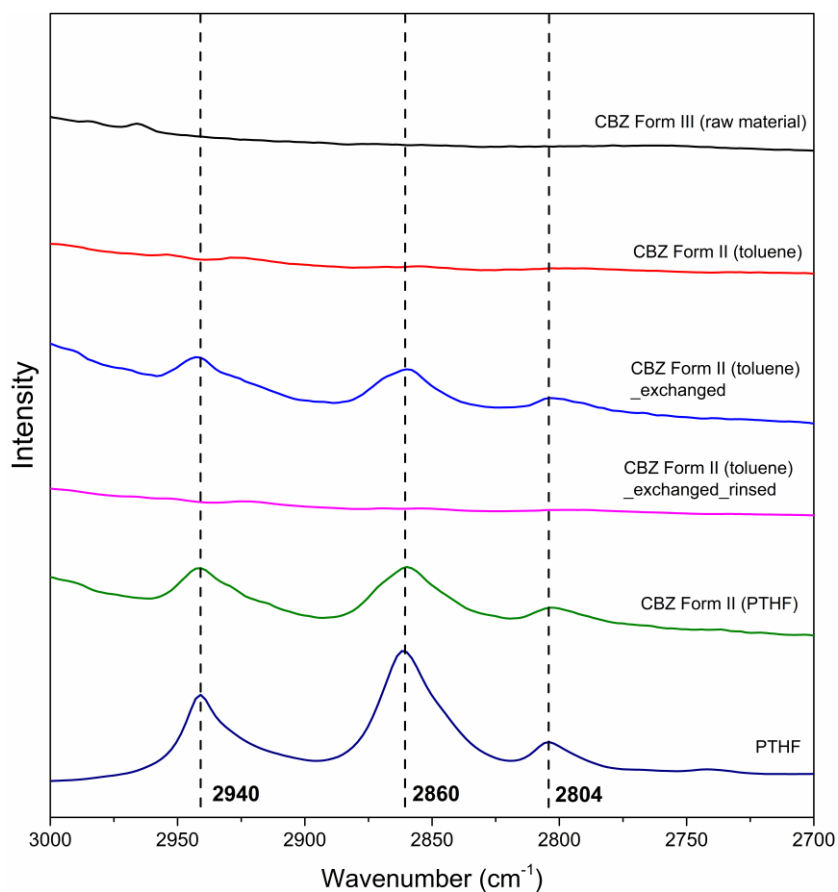

**Fig. S18** ATR-FTIR spectra (from top to bottom): CBZ Form III (raw material); initial CBZ Form II (toluene); guest-exchanged CBZ Form II (initial  $C_{\text{PTHF}} = 12 \text{ mg/mL}$ ); guest-exchanged CBZ Form II after rinsing with EtOAc; CBZ Form II (PTHF); PTHF raw material. The dashed lines indicate the characteristic stretching vibrations of  $\text{CH}_2$  groups on PTHF chains.<sup>1,2</sup> The IR absorption at  $2940 \text{ cm}^{-1}$  corresponds to asymmetric stretching vibration of the  $\text{CH}_2$  groups not linked to the oxygen atoms. The IR absorption at  $2860 \text{ cm}^{-1}$  and  $2804 \text{ cm}^{-1}$  arises from the asymmetric and symmetric stretching vibrations of the  $\text{CH}_2$  groups linked to the oxygen atoms, respectively

Table S1.  $^1\text{H}$   $T_1$  and  $T_{1\rho}$  values of CBZ Form II (PTHF), CBZ Form III and PTHF bulk crystals.

| Sample       | Relaxation Type               | Integral region or peak (ppm) | Relaxation Time  |
|--------------|-------------------------------|-------------------------------|------------------|
| CBZ Form II  | $^1\text{H}$ $T_1$ (s)        | 161.928-155.862               | 7.196 (0.028)    |
|              |                               | 144.809-137.800               | 7.169 (0.017)    |
|              |                               | 129.577-126.882               | 7.433 (0.072)    |
|              |                               | 126.882-121.220               | 7.165 (0.035)    |
|              |                               | 74.717-71.077                 | 8.084 (0.144)    |
|              |                               | 29.022-25.517                 | 7.294 (0.104)    |
|              | $^1\text{H}$ $T_{1\rho}$ (ms) | 159.097                       | 17.075 (0.276)   |
|              |                               | 141.170                       | 16.887 (0.364)   |
|              |                               | 127.825                       | 16.290 (0.394)   |
|              |                               | 126.073                       | 16.610 (0.547)   |
| CBZ Form III | $^1\text{H}$ $T_1$ (s)        | 73.099                        | 19.337 (0.275)   |
|              |                               | 27.674                        | 18.313 (0.504)   |
|              |                               | 161.254-155.727               | 300.873 (9.080)  |
|              |                               | 142.248-138.204               | 291.192 (3.154)  |
|              | $^1\text{H}$ $T_{1\rho}$ (ms) | 130.117-127.690               | 340.782 (24.414) |
|              |                               | 127.690-124.051               | 309.264 (1.465)  |
|              |                               | 160.715-156.266               | 7.482 (0.112)    |
|              |                               | 141.574-138.743               | 13.591 (0.315)   |
| PTHF         | $^1\text{H}$ $T_1$ (s)        | 130.117-127.690               | 15.400 (0.239)   |
|              |                               | 127.690-124.455               | 13.088 (0.660)   |
|              | $^1\text{H}$ $T_{1\rho}$ (ms) | 73.435-71.419                 | 1.248 (0.002)    |
|              |                               | 30.745-25.117                 | 1.242 (0.002)    |
|              |                               | 74.519-71.334                 | 8.033 (0.462)    |
|              |                               | 30.172-25.387                 | 9.370 (0.552)    |

## References

- 1 K. Imada, T. Miyakawa, Y. Chatani, H. Tadokoro and S. Murahashi, *Makromol. Chem.*, 1965, **83**,

113-128.

2 K. Imada, H. Tadokoro, A. Umehara and S. Murahash, *J. Chem. Phys.*, 1965, **42**, 2807-2816.
